# Supplementary material for: A Prospective Life Cycle Assessment (LCA) of Monomer Synthesis: Comparison of Biocatalytic and Oxidative Chemistry
Source: PubMed Central journal article supplement — ChemSusChem. 2019 Feb 27;12(7):1349–60. doi: 10.1002/cssc.201900007 (PMC6563695; doi:10.1002/cssc.201900007), 2019-02-27
Supplement: CSSC-12-1349-s001.pdf [file CSSC-12-1349-s001.pdf]

## Supporting Information

### **A Prospective Life Cycle Assessment (LCA) of Monomer Synthesis: Comparison of Biocatalytic and Oxidative Chemistry**

Marie A. F. Delgove,<sup>[a]</sup> Achille-B. Laurent,<sup>[a]</sup> John M. Woodley,<sup>[b]</sup> Stefaan M. A. De Wildeman,<sup>\*[a]</sup>  
Katrien V. Bernaerts,<sup>[a]</sup> and Yvonne van der Meer<sup>[a]</sup>

cssc\_201900007\_sm\_miscellaneous\_information.pdf

### **Content of the supplementary information:**

**Table S1.** Details of the electricity consumption for each synthesis step.

**Table S2.** Pedigree matrix.

**Table S3.** Impact category values and uncertainty values for the chemical and enzymatic syntheses.

**Figure S1.** Contribution of chemicals to the GWP of the synthesis of the product when no recycling of chemicals is considered with a) chemical synthesis, and b) the enzymatic synthesis.

**Figure S2.** Alternative process flowsheet for the enzymatic synthesis of the product TMCL with recycling of the enzyme with (4)' whole-cells in fermentation broth, and (4)'' whole-cells in buffer.

**Figure S3.** Alternative process flowsheet for the chemical synthesis of the product TMCL using peracetic acid as oxidant.

**Figure S4.** Conversion of the enzymatic reaction followed by GC-FID.

### **References**

**Table S1.** Details of the electricity consumption for each synthesis step.

| Synthesis                       | Operation                                                                              | Electricity consumption                  |
|---------------------------------|----------------------------------------------------------------------------------------|------------------------------------------|
| (1) Synthesis of TMCH           | Stirring of the reaction                                                               | 2.002 kWh                                |
|                                 | Reaction under pressure in autoclave                                                   | 0.002 kWh                                |
| (2) Synthesis of <i>m</i> -CPBA | Stirring and heating                                                                   | 0.606 kWh                                |
|                                 | Removal of solvent by rotary evaporation                                               | 0.018 kWh                                |
| (3) Chemical synthesis of TMCL  | Stirring of the reaction                                                               | $E_1 = 17.150$ kWh                       |
|                                 | Filtration of side-product with a vacuum pump                                          | $E_2 = 0.017$ kWh                        |
|                                 | Removal of solvent by rotary evaporation                                               | $E_3 = 0.399$ kWh                        |
| (4) Preparation of enzymes      | Pre-incubation                                                                         | $E_1'' = 3.154$ kWh                      |
|                                 | Incubation                                                                             | $E_2'' = 2.456$ kWh                      |
|                                 | Cell separation by centrifugation                                                      | $E_3'' = 0.277$ kWh                      |
|                                 | Cell sonication                                                                        | $E_4'' = 0.007$ kWh                      |
|                                 | Enzyme separation by centrifugation                                                    | $E_5'' = 0.832$ kWh                      |
| (5) Enzymatic synthesis of TMCL | Temperature and pH control, stirring of the reaction, continuous addition of substrate | $E_1' = 2.575$ kWh                       |
|                                 | Removal of solvent by rotary evaporation                                               | $E_2' = 0.083$ kWh                       |
|                                 | Removal of protein by centrifugation                                                   | $E_3' = 0.443$ kWh                       |
|                                 | Removal of solvent by rotary evaporation                                               | $E_4' = 0.083$ kWh<br>$E_5' = 0.018$ kWh |
|                                 | Enzyme separation by ultrafiltration <sup>[1]</sup>                                    | $E_6' = 0.011$ kWh                       |

**Table S2.** Pedigree matrix.

For all chemicals, the following pedigree matrix was applied (basic uncertainty of 1.07):

| <b>Category</b>                   | <b>Description</b>                                                                        |
|-----------------------------------|-------------------------------------------------------------------------------------------|
| Reliability                       | Qualified estimate                                                                        |
| Completeness                      | Representative data from only one site relevant to the market considered                  |
| Temporal correlation              | Age of data unknown or more than 15 years of difference to the time period of the dataset |
| Geographical correlation          | Average data from larger area in which area under study is included                       |
| Further technological correlation | Data on related processes on laboratory scale or from different technology                |
| Sample size                       | Unknown                                                                                   |

For the enzyme production from potato starch which is from the *Ecoinvent* database, the following pedigree matrix was applied (basic uncertainty of 1.5):

| <b>Category</b>                   | <b>Description</b>                                                                        |
|-----------------------------------|-------------------------------------------------------------------------------------------|
| Reliability                       | Verified data based on measurements                                                       |
| Completeness                      | Representativeness unknown or data from a small number of sites and from shorter periods  |
| Temporal correlation              | Age of data unknown or more than 15 years of difference to the time period of the dataset |
| Geographical correlation          | Average data from larger area in which area under study is included                       |
| Further technological correlation | Data on related processes on laboratory scale or from different technology                |
| Sample size                       | Unknown                                                                                   |

**Table S3.** Impact category values and uncertainty values for the chemical and enzymatic syntheses.

|                   |                                       | Chemical synthesis        |                           |                                 |                                  | Enzymatic synthesis       |                           |                                 |                                  |
|-------------------|---------------------------------------|---------------------------|---------------------------|---------------------------------|----------------------------------|---------------------------|---------------------------|---------------------------------|----------------------------------|
|                   |                                       | Impact                    | SD                        | 2.5 <sup>th</sup><br>percentile | 97.5 <sup>th</sup><br>percentile | Impact                    | SD                        | 2.5 <sup>th</sup><br>percentile | 97.5 <sup>th</sup><br>percentile |
| Ecosystem quality | PDF.m <sup>-2</sup> .yr <sup>-1</sup> | 0.28                      | 0.12                      | 0.13                            | 0.58                             | 0.30                      | 0.15                      | 0.13                            | 0.65                             |
| Human health      | DALY                                  | 1.20.<br>10 <sup>-6</sup> | 3.91.<br>10 <sup>-7</sup> | 6.42.<br>10 <sup>-7</sup>       | 2.30.<br>10 <sup>-6</sup>        | 1.17.<br>10 <sup>-6</sup> | 5.00.<br>10 <sup>-7</sup> | 5.47.<br>10 <sup>-7</sup>       | 2.25.<br>10 <sup>-6</sup>        |
| Resources         | MJ primary                            | 32.47                     | 12.69                     | 15.73                           | 66.99                            | 36.35                     | 16.68                     | 16.63                           | 76.71                            |
| Global warming    | kg CO <sub>2</sub> eq                 | 1.646                     | 0.59                      | 0.83                            | 3.30                             | 1.639                     | 0.67                      | 0.78                            | 3.34                             |

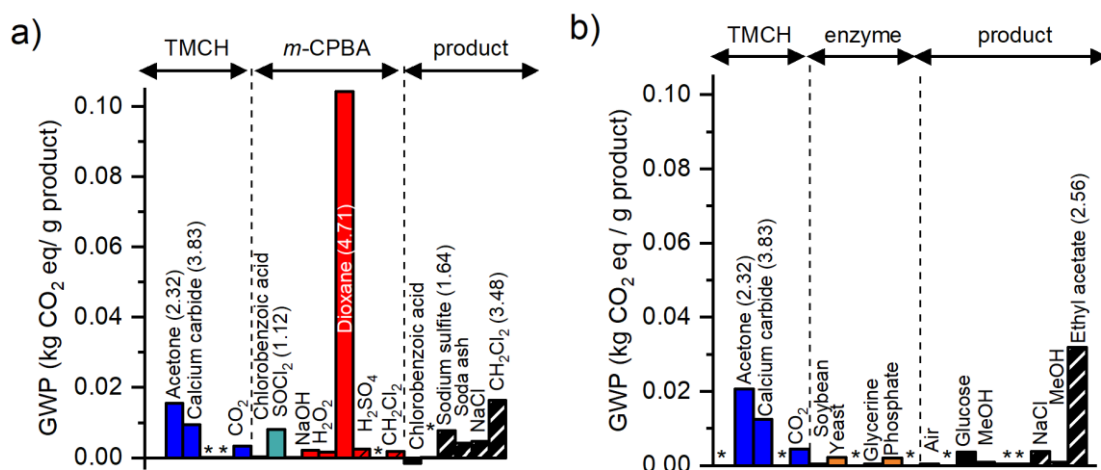

**Figure S1.** Contribution of chemicals to the GWP of the synthesis of the product when no recycling of chemicals is considered with a) chemical synthesis, and b) the enzymatic synthesis. Stripes indicate chemicals used for downstream processing. Stars indicate chemicals with negligible contributions. The values in parentheses indicate the global warming potential of the synthesis of 1 kg of the chemicals with the largest contributions (as expressed in kg CO<sub>2</sub> eq / kg product).

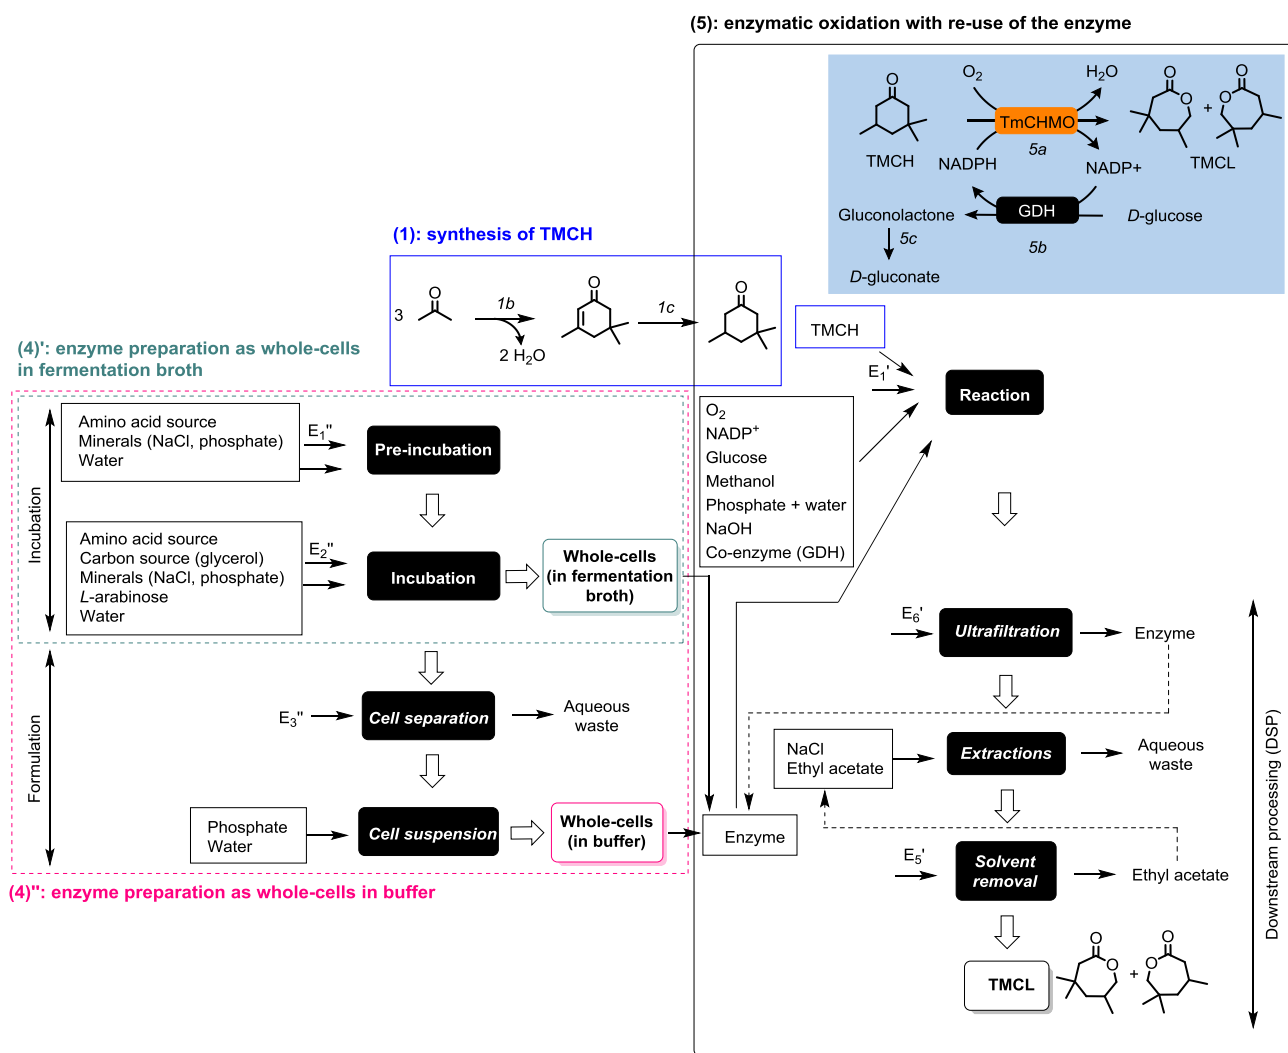

**Figure S2.** Alternative process flowsheet for the enzymatic synthesis of the product TMCL with recycling of the enzyme with (4)' whole-cells in fermentation broth (in green), and (4)'' whole-cells in buffer (in pink). See Table 2 for the details of the electricity consumptions. Dotted arrows indicate recycling streams.

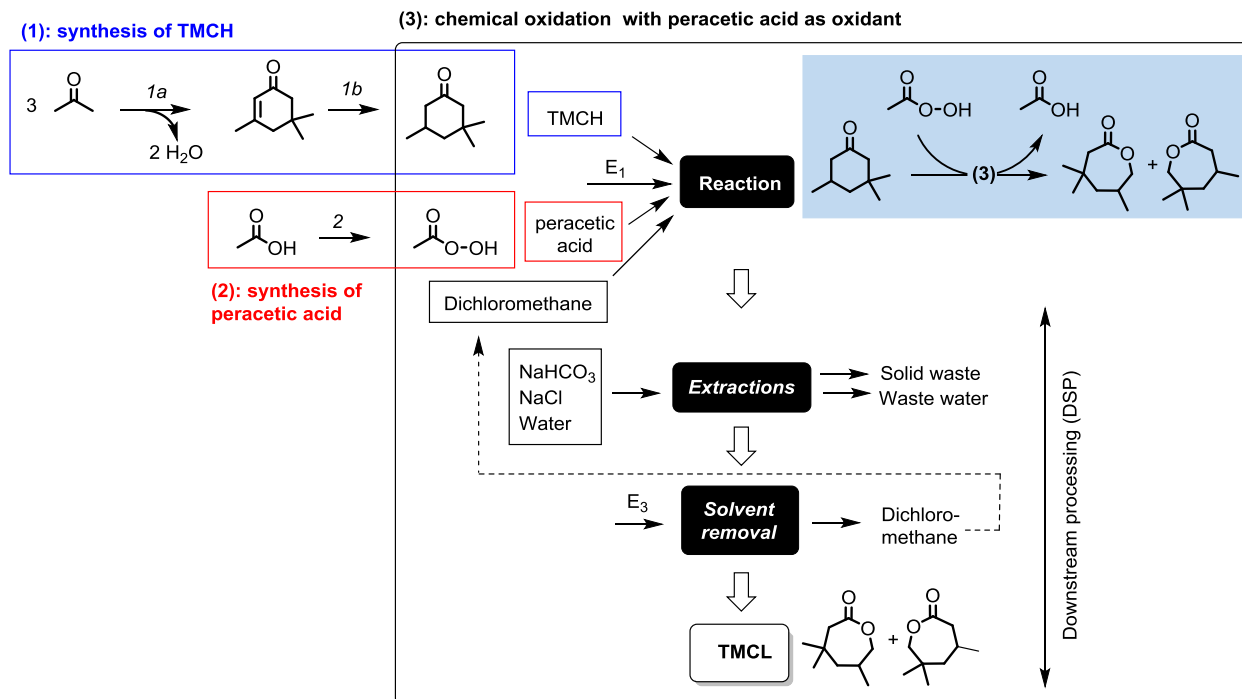

**Figure S3.** Alternative process flowsheet for the chemical synthesis of the product TMCL using peracetic acid as oxidant. See Table S1 for the details of the electricity consumptions. Dotted arrows indicate recycling streams.



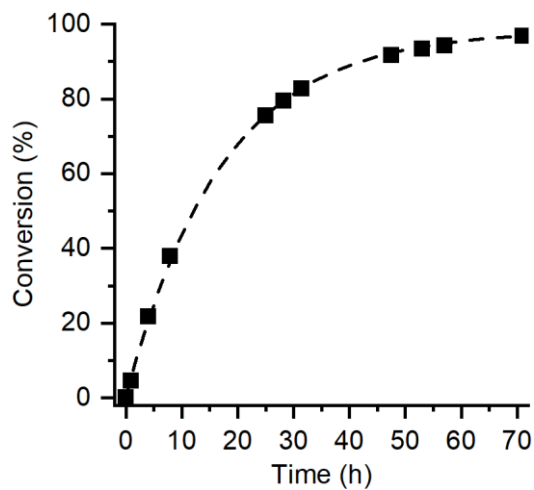

**Figure S4.** Conversion of the enzymatic reaction followed by GC-FID (the measurements were performed as described in reference <sup>[2]</sup>). Reaction conditions: 2 equivalents *m*-CPBA, [substrate] = 0.2 M in dichloromethane, room temperature.

## References

- [1] A. Bahnasawy, M. Shenana, *Australian Journal of Agricultural Engineering* **2010**, *1*, 54.
- [2] M. Delgove, M. Elford, K. Bernaerts, S. De Wildeman, *Organic Process Research & Development* **2018**, *22*, 803-812.
